# Supplementary material for: Chondroitin Sulfate Proteoglycan 4 as a Marker for Aggressive Squamous Cell Carcinoma
Source: MDPI journal article supplement (doi:10.3390/cancers14225564), 2022-11-13
Supplement: s1 [file s1]

# Chondroitin sulfate proteoglycan 4 as a marker for aggressive squamous cell carcinoma

Kathryn Chen <sup>1,2</sup>, Joel Yong <sup>1,3</sup>, Roland Zauner <sup>4</sup>, Verena Wally <sup>4</sup>, John Whitelock <sup>1,5</sup>, Mila Sajinovic <sup>1</sup>, Zlatko Ko-pecki <sup>6</sup>, Kang Liang <sup>1,3</sup>, Kieran Francis Scott <sup>1,2</sup> and Albert Sleiman Mellick <sup>1,5,\*</sup>

## Supplementary Data

**Supplementary Table S1.** Top 100 genes expressed in HNSCC and correlated with CSPG4 ( $R_1 > 0.46$ , by Pearson correlation). Data derived from TCGA [47]. Also shown correlation of CSPG4 with genes in RDEB-SCCs ( $R_2$ ) [43,145]. Genes significantly correlated with CSPG4 in both HNSCC, and RDEB-SCC are indicated <sup>#</sup>, and bolded ( $R > 0.46$ , both HNSC & RDEB-SCC). Also shown gene function based on OMIM ontology analysis [135]. ADH – adhesion, EMT – epithelial to mesenchymal transition, GPS – growth, proliferation, survival, IMM – invasion, migration, metastasis, IMU – immune, OTH – other; SIG – signalling, TRA – miscellaneous cell transport events, TRN – transcription.

|                | Ensembl                   | R1          | R2                      | OMIM                 |
|----------------|---------------------------|-------------|-------------------------|----------------------|
| PDPN           | ENSG00000162493.16        | 0.61        | 0.32                    | IMM, GPS, ADH        |
| PLEC           | ENSG00000178209.14        | 0.61        | -0.48                   | ADH                  |
| FLRT2          | ENSG00000185070.10        | 0.6         | -0.07                   | ADH                  |
| CYP26B1        | ENSG00000003137.8         | 0.59        | -0.52                   | IMU                  |
| <b>MN1</b>     | <b>ENSG00000169184.5</b>  | <b>0.58</b> | <b>0.73<sup>#</sup></b> | <b>TRN</b>           |
| PIK3CD         | ENSG00000171608.15        | 0.58        | -0.67                   | GPS, SIG, EMT        |
| PTRF           | ENSG00000177469.12        | 0.58        | -                       | TRA, SIG             |
| <b>LAMC2</b>   | <b>ENSG00000058085.14</b> | <b>0.57</b> | <b>0.95<sup>#</sup></b> | <b>ADH, IMM, SIG</b> |
| <b>APP</b>     | <b>ENSG00000142192.20</b> | <b>0.57</b> | <b>0.49<sup>#</sup></b> | <b>TRN</b>           |
| ITGA3          | ENSG00000005884.17        | 0.57        | 0.19                    | ADH                  |
| <b>SIRPA</b>   | <b>ENSG00000198053.11</b> | <b>0.56</b> | <b>0.85<sup>#</sup></b> | <b>SIG</b>           |
| <b>SNAI2</b>   | <b>ENSG00000019549.8</b>  | <b>0.56</b> | <b>0.61<sup>#</sup></b> | <b>TRN, EMT</b>      |
| <b>COL17A1</b> | <b>ENSG00000065618.16</b> | <b>0.56</b> | <b>0.54<sup>#</sup></b> | <b>ADH</b>           |
| PMEPA1         | ENSG00000124225.15        | 0.56        | 0.42                    | SIG                  |
| LAMA3          | ENSG00000053747.15        | 0.56        | 0.25                    | ADH, IMM, SIG        |
| LRR8C          | ENSG00000171488.14        | 0.56        | -0.1                    | TRA                  |
| <b>TENM3</b>   | <b>ENSG00000218336.7</b>  | <b>0.55</b> | <b>0.86<sup>#</sup></b> | <b>OTH</b>           |
| <b>ACTN1</b>   | <b>ENSG00000072110.13</b> | <b>0.55</b> | <b>0.6<sup>#</sup></b>  | <b>ADH, IMM</b>      |
| LTBP1          | ENSG00000049323.15        | 0.55        | -0.09                   | SIG                  |
| CSMD2          | ENSG00000121904.17        | 0.55        | -0.19                   | IMM                  |
| WNT7A          | ENSG00000154764.5         | 0.55        | -0.37                   | SIG                  |
| CSPG4P13       | ENSG00000260139.6         | 0.55        | -0.81                   | Other                |
| APBB2          | ENSG00000163697.16        | 0.54        | 0.11                    | TRN                  |
| SDK2           | ENSG00000069188.16        | 0.54        | -0.22                   | ADH                  |
| ANTXR2         | ENSG00000163297.16        | 0.54        | -0.59                   | ADH                  |
| <b>PRNP</b>    | <b>ENSG00000171867.16</b> | <b>0.53</b> | <b>0.68<sup>#</sup></b> | <b>NA</b>            |
| <b>SLC12A4</b> | <b>ENSG00000124067.16</b> | <b>0.53</b> | <b>0.57<sup>#</sup></b> | <b>NA</b>            |
| KIAA1644       | ENSG00000138944.7         | 0.53        | 0.42                    | Other                |
| ANXA5          | ENSG00000164111.14        | 0.53        | 0.33                    | GPS, TRA, SIG        |
| PXN            | ENSG00000089159.15        | 0.53        | 0.32                    | ADH                  |
| SPON2          | ENSG00000159674.11        | 0.53        | 0.11                    | ADH                  |
| STON2          | ENSG00000140022.9         | 0.53        | 0.05                    | TRA                  |

|                     |                           |             |                         |                      |
|---------------------|---------------------------|-------------|-------------------------|----------------------|
| IRS1                | ENSG00000169047.5         | 0.53        | -0.12                   | TRA                  |
| CD276               | ENSG00000103855.17        | 0.53        | -0.33                   | IMU                  |
| TNFRSF12A           | ENSG00000006327.13        | 0.53        | -0.49                   | SIG                  |
| LAMB3               | ENSG00000196878.12        | 0.53        | -0.72                   | GPS                  |
| RTN4                | ENSG00000115310.17        | 0.53        | -                       | GPS                  |
| <b>ITGA5</b>        | <b>ENSG00000161638.10</b> | <b>0.52</b> | <b>0.93<sup>#</sup></b> | <b>SIG</b>           |
| <b>ITGA6</b>        | <b>ENSG00000091409.14</b> | <b>0.52</b> | <b>0.56<sup>#</sup></b> | <b>IMM</b>           |
| VEGFC               | ENSG00000150630.3         | 0.52        | 0.44                    | GPS, TRN             |
| SLC39A13            | ENSG00000165915.13        | 0.52        | 0.13                    | TRA                  |
| CYP27C1             | ENSG00000186684.12        | 0.52        | 0.08                    | TRN                  |
| MUL1                | ENSG00000090432.6         | 0.52        | -0.63                   | SIG                  |
| AJAP1               | ENSG00000196581.10        | 0.51        | 0.36                    | IMM                  |
| AC108142.1          | ENSG00000177822.7         | 0.51        | 0.26                    | Other                |
| INHBA               | ENSG00000122641.9         | 0.51        | 0.11                    | GPS, EMT             |
| EFNB1               | ENSG00000090776.5         | 0.51        | -0.35                   | GPS, TRN             |
| PLCD4               | ENSG00000115556.13        | 0.51        | -0.67                   | SIG                  |
| EXT1                | ENSG00000182197.10        | 0.51        | -0.71                   | GPS                  |
| GNA12               | ENSG00000146535.13        | 0.51        | -                       | GPS, IMM, SIG        |
| <b>EDNRA</b>        | <b>ENSG00000151617.15</b> | <b>0.5</b>  | <b>0.74<sup>#</sup></b> | <b>TRN</b>           |
| <b>PLEK2</b>        | <b>ENSG00000100558.8</b>  | <b>0.5</b>  | <b>0.65<sup>#</sup></b> | <b>GPS, IMM</b>      |
| <b>ITGB1</b>        | <b>ENSG00000150093.18</b> | <b>0.5</b>  | <b>0.53<sup>#</sup></b> | <b>GPS</b>           |
| EHD2                | ENSG00000024422.11        | 0.5         | 0.43                    | TRA                  |
| GRIA3               | ENSG00000125675.17        | 0.5         | -0.21                   | TRA                  |
| RP11-497E19.1       | ENSG00000205562.2         | 0.5         | -0.32                   | Other                |
| SERPINE1            | ENSG00000106366.8         | 0.5         | -0.34                   | TRN                  |
| KIRREL              | ENSG00000183853.17        | 0.5         | -0.35                   | Other                |
| CD151               | ENSG00000177697.17        | 0.5         | -0.41                   | GPS, SIG             |
| COL4A2              | ENSG00000134871.17        | 0.5         | -0.64                   | GPS                  |
| SEMA3C              | ENSG00000075223.13        | 0.5         | -                       | GPS                  |
| CLMP                | ENSG00000166250.11        | 0.5         | -                       | ADH                  |
| <b>PLAU</b>         | <b>ENSG00000122861.15</b> | <b>0.49</b> | <b>0.75<sup>#</sup></b> | <b>IMM</b>           |
| <b>P4HA2</b>        | <b>ENSG00000072682.18</b> | <b>0.49</b> | <b>0.66<sup>#</sup></b> | <b>GPS, SIG</b>      |
| <b>VAV2</b>         | <b>ENSG00000160293.16</b> | <b>0.49</b> | <b>0.66<sup>#</sup></b> | <b>SIG</b>           |
| <b>ACTR1A</b>       | <b>ENSG00000138107.11</b> | <b>0.49</b> | <b>0.66<sup>#</sup></b> | <b>TRA</b>           |
| <b>RAB11FIP5</b>    | <b>ENSG00000135631.15</b> | <b>0.49</b> | <b>0.64<sup>#</sup></b> | <b>TRA</b>           |
| <b>RP11-167H9.3</b> | <b>ENSG00000243321.3</b>  | <b>0.49</b> | <b>0.63<sup>#</sup></b> | <b>Other</b>         |
| <b>LUZP1</b>        | <b>ENSG00000169641.13</b> | <b>0.49</b> | <b>0.59<sup>#</sup></b> | <b>SIG</b>           |
| ESYT1               | ENSG00000139641.12        | 0.49        | 0.31                    | GPS, TRA             |
| PDGFC               | ENSG00000145431.10        | 0.49        | 0.17                    | GPS                  |
| DSE                 | ENSG00000111817.16        | 0.49        | -0.09                   | IMU, TRN             |
| PANX1               | ENSG00000110218.8         | 0.49        | -0.11                   | SIG                  |
| DKK3                | ENSG00000050165.17        | 0.49        | -0.12                   | SIG                  |
| TLL1                | ENSG00000038295.7         | 0.49        | -                       | Other                |
| <b>TSPAN5</b>       | <b>ENSG00000168785.7</b>  | <b>0.48</b> | <b>0.76<sup>#</sup></b> | <b>GPS, ADH, IMM</b> |
| <b>SRRD</b>         | <b>ENSG00000100104.12</b> | <b>0.48</b> | <b>0.62<sup>#</sup></b> | <b>Other</b>         |
| FBLIM1              | ENSG00000162458.12        | 0.48        | 0.16                    | ADH                  |
| MSN                 | ENSG00000147065.16        | 0.48        | 0.01                    | IMM, SIG             |
| SLC9A1              | ENSG00000090020.10        | 0.48        | -0.57                   | Other                |
| CHSY1               | ENSG00000131873.5         | 0.48        | -0.6                    | GPS                  |
| COL16A1             | ENSG00000084636.17        | 0.48        | -0.61                   | Other                |
| EHD1                | ENSG00000110047.17        | 0.47        | 0.62                    | TRA                  |
| PTPN21              | ENSG00000070778.12        | 0.47        | 0.31                    | GPS, SIG             |
| LIMA1               | ENSG00000050405.13        | 0.47        | 0.24                    | ADH                  |

|               |                           |             |                         |            |
|---------------|---------------------------|-------------|-------------------------|------------|
| PLOD1         | ENSG00000083444.16        | 0.47        | -0.3                    | TRN        |
| CLSTN1        | ENSG00000171603.16        | 0.47        | -0.5                    | TRA, SIG   |
| TSHZ3         | ENSG00000121297.6         | 0.47        | -0.74                   | TRN, SIG   |
| <b>SORCS2</b> | <b>ENSG00000184985.16</b> | <b>0.46</b> | <b>0.49<sup>#</sup></b> | <b>SIG</b> |
| PHLDB1        | ENSG00000019144.16        | 0.46        | 0.39                    | GPS, EMT   |
| VDR           | ENSG00000111424.10        | 0.46        | 0.19                    | TRN        |
| PTK7          | ENSG00000112655.15        | 0.46        | 0.14                    | IMM        |
| COL4A1        | ENSG00000187498.14        | 0.46        | 0.13                    | TRN        |
| AFAP1L1       | ENSG00000157510.13        | 0.46        | 0.05                    | GPS        |
| TGFBR2        | ENSG00000163513.17        | 0.46        | -0.12                   | TRN, SIG   |
| TGFBI         | ENSG00000120708.16        | 0.46        | -0.18                   | TRN        |
| SCRN1         | ENSG00000136193.16        | 0.46        | -0.44                   | Other      |
| MYH9          | ENSG00000100345.20        | 0.46        | -0.48                   | TRN        |
| MMP14         | ENSG00000157227.12        | 0.46        | -0.58                   | TRN        |
| NT5E          | ENSG00000135318.11        | 0.46        | -0.58                   | TRN        |
